# Supplementary material for: Dock-and-lock binding of SxIP ligands is required for stable and selective EB1 interactions
Source: eLife. 2025 Dec 10;13:RP98063. doi: 10.7554/eLife.98063 (PMC12695022; doi:10.7554/eLife.98063)
Supplement: Figure 1—source data 1. [file elife-98063-fig1-data1.xlsx]

## Sheet: 4mer
Resonance	Value	(ppm)	Resonance	Value	(ppm)
193AlaH	8.45596		193AlaH	8.45408
193AlaN	121.516		193AlaN	121.507
194AlaH	7.96727		194AlaH	7.96454
194AlaN	119.898		194AlaN	119.882
195GluH	7.80166		195GluH	7.79715
195GluN	118.671		195GluN	118.649
196LeuH	8.27028		196LeuH	8.27049
196LeuN	121.704		196LeuN	121.701
197MetH	8.51784		197MetH	8.51524
197MetN	118.483		197MetN	118.497
198GlnH	7.53363		198GlnH	7.53363
198GlnHe21	6.79676		198GlnHe21	6.7951
198GlnHe22	7.2973		198GlnHe22	7.29765
198GlnN	119.033		198GlnN	119.017
198GlnNe2	111.387		198GlnNe2	111.387
199GlnH	7.73141		199GlnH	7.72792
199GlnHe21	7.21333		199GlnHe21	7.2096
199GlnHe22	6.69857		199GlnHe22	6.69764
199GlnN	119.56		199GlnN	119.539
199GlnNe2	110.174		199GlnNe2	110.161
200ValH	8.32002		200ValH	8.32208
200ValN	119.587		200ValN	119.591
201AsnH	7.59072		201AsnH	7.59717
201AsnN	118.749		201AsnN	118.741
202ValH	7.88915		202ValH	7.88145
202ValN	118.214		202ValN	118.299
203LeuH	8.49951		203LeuH	8.50787
203LeuN	123.081		203LeuN	123.12
204LysH	8.69726		204LysH	8.70277
204LysN	119.16		204LysN	119.183
205LeuH	7.4791		205LeuH	7.4836
205LeuN	120.255		205LeuN	120.257
206ThrH	8.04925		206ThrH	8.05122
206ThrN	118.066		206ThrN	118.087
207ValH	8.41831		207ValH	8.43386
207ValN	121.554		207ValN	121.59
208GluH	7.58266		208GluH	7.57929
208GluN	118.296		208GluN	118.285
209AspH	8.08732		209AspH	8.08375
209AspN	120.035		209AspN	120.011
210LeuH	8.49045		210LeuH	8.49039
210LeuN	122.477		210LeuN	122.329
211GluH	8.87198		211GluH	8.86373
211GluN	119.981		211GluN	120.013
212LysH	7.50507		212LysH	7.512
212LysN	117.376		212LysN	117.447
213GluH	7.84648		213GluH	7.86775
213GluN	121.61		213GluN	121.461
214ArgH	8.9451		214ArgH	8.95404
214ArgN	118.985		214ArgN	119.097
215AspH	8.78007		215AspH	8.77978
215AspN	119.066		215AspN	119.082
216PheH	8.16938		216PheH	8.1863
216PheN	124.752		216PheN	124.815
217TyrH	8.13814		217TyrH	8.1488
217TyrN	118.52		217TyrN	118.601
218PheH	9.11522		218PheH	9.14329
218PheN	120.448		218PheN	120.6
219GlyH	8.41718		219GlyH	8.4417
219GlyN	105.328		219GlyN	105.327
220LysH	7.1606		220LysH	7.14916
220LysN	120.625		220LysN	120.502
221LeuH	7.47129		221LeuH	7.4479
221LeuN	118.884		221LeuN	118.814
222ArgH	8.09933		222ArgH	8.1526
222ArgN	119.359		222ArgN	119.311
223AsnH	7.72451		223AsnH	7.72795
223AsnHd21	7.26831		223AsnHd21	7.24758
223AsnHd22	6.87443		223AsnHd22	6.87937
223AsnN	118.09		223AsnN	118.152
223AsnNd2	112.341		223AsnNd2	112.302
224IleH	8.31466		224IleH	8.29816
224IleN	122.448		224IleN	122.451
225GluH	8.55064		225GluH	8.599
225GluN	122.994		225GluN	123.068
226LeuH	7.6319		226LeuH	7.62791
226LeuN	118.406		226LeuN	118.354
227IleH	7.35357		227IleH	7.35349
227IleN	119.919		227IleN	119.913
228CysH	8.08107		228CysH	8.10873
228CysN	118.592		228CysN	118.713
229GlnH	8.26424		229GlnH	8.2862
229GlnHe21	7.35446		229GlnHe21	7.34811
229GlnHe22	6.60201		229GlnHe22	6.59469
229GlnN	119.502		229GlnN	119.56
229GlnNe2	110.586		229GlnNe2	110.509
230GluH	7.92643		230GluH	7.94936
230GluN	119.075		230GluN	119.148
231AsnH	7.33487		231AsnH	7.32757
231AsnHd21	7.71133		231AsnHd21	7.71545
231AsnHd22	7.10997		231AsnHd22	7.13444
231AsnN	115.6		231AsnN	115.472
231AsnNd2	116.185		231AsnNd2	116.281
232GluH	7.69324		232GluH	7.65918
232GluN	121.856		232GluN	121.896
233GlyH	8.60953		233GlyH	8.63556
233GlyN	108.974		233GlyN	108.874
234GluH	7.87425		234GluH	7.83469
234GluN	118.374		234GluN	118.271
235AsnH	8.21751		235AsnH	8.19508
235AsnHd21	6.74981		235AsnHd21	6.74551
235AsnHd22	7.45924		235AsnHd22	7.45681
235AsnN	117.791		235AsnN	117.633
235AsnNd2	112.337		235AsnNd2	112.364
236AspH	8.33684		236AspH	8.34647
236AspN	122.271		236AspN	122.072
238ValH	8.0367		238ValH	8.02854
238ValN	119.976		238ValN	119.961
239LeuH	7.7293		239LeuH	7.685
239LeuN	119.135		239LeuN	119.034
240GlnH	8.1218		240GlnH	8.08792
240GlnHe21	7.49176		240GlnHe21	7.48167
240GlnHe22	6.72186		240GlnHe22	6.71178
240GlnN	116.664		240GlnN	116.66
240GlnNe2	113.836		240GlnNe2	113.711
241ArgH	7.30366		241ArgH	7.30067
241ArgN	117.884		241ArgN	117.936
242IleH	7.45452		242IleH	7.45574
242IleN	120.197		242IleN	120.243
243ValH	8.43276		243ValH	8.40318
243ValN	122.079		243ValN	122.028
244AspH	7.95904		244AspH	7.92018
244AspN	118.179		244AspN	118.067
245IleH	7.23981		245IleH	7.24312
245IleN	119.538		245IleN	119.518
246LeuH	8.31352		246LeuH	8.30559
246LeuN	120.629		246LeuN	120.682
247TyrH	7.76154		247TyrH	7.66368
247TyrN	114.756		247TyrN	113.899
248AlaH	7.28328		248AlaH	7.27412
248AlaN	124.11		248AlaN	123.913
249ThrH	8.55584		249ThrH	8.53176
249ThrN	114.122		249ThrN	113.632
250AspH	8.33004		250AspH	8.32625
250AspN	121.532		250AspN	121.452
251GluH	8.39981		251GluH	8.41026
251GluN	121.699		251GluN	121.68
252GlyH	8.34319		252GlyH	8.34367
252GlyN	109.276		252GlyN	109.282
253PheH	7.84666		253PheH	7.83645
253PheN	120.084		253PheN	120.06
254ValH	7.89815		254ValH	7.89877
254ValN	123.686		254ValN	123.604
255IleH	8.25061		255IleH	8.24468
255IleN	127.706		255IleN	127.607
257AspH	8.29318		257AspH	8.29337
257AspN	121.137		257AspN	121.106
258GluH	8.38566		258GluH	8.37838
258GluN	121.852		258GluN	121.823
259GlyH	8.42204		259GlyH	8.41909
259GlyN	110.28		259GlyN	110.267
260GlyH	7.8767		260GlyH	7.87662
260GlyN	115.207		260GlyN	115.192

## Sheet: 6mer
Resonance	Value	(ppm)	Resonance	Value	(ppm)
193AlaH	8.45605		193AlaH	8.4544
193AlaN	121.52		193AlaN	121.518
194AlaH	7.96645		194AlaH	7.96719
194AlaN	119.891		194AlaN	119.885
195GluH	7.80126		195GluH	7.8019
195GluN	118.67		195GluN	118.674
196LeuH	8.27096		196LeuH	8.26946
196LeuN	121.707		196LeuN	121.703
197MetH	8.51832		197MetH	8.51482
197MetN	118.487		197MetN	118.486
198GlnH	7.53261		198GlnH	7.53585
198GlnHe21	6.79597		198GlnHe21	6.79604
198GlnHe22	7.29662		198GlnHe22	7.29929
198GlnN	119.046		198GlnN	119.02
198GlnNe2	111.385		198GlnNe2	111.396
199GlnH	7.72929		199GlnH	7.72947
199GlnHe21	7.21293		199GlnHe21	7.2103
199GlnHe22	6.69784		199GlnHe22	6.69963
199GlnN	119.571		199GlnN	119.549
199GlnNe2	110.176		199GlnNe2	110.171
200ValH	8.32055		200ValH	8.3237
200ValN	119.595		200ValN	119.572
201AsnH	7.59376		201AsnH	7.59565
201AsnN	118.749		201AsnN	118.739
202ValH	7.88949		202ValH	7.88442
202ValN	118.255		202ValN	118.261
203LeuH	8.4997		203LeuH	8.51227
203LeuN	123.078		203LeuN	123.119
204LysH	8.69881		204LysH	8.70453
204LysN	119.163		204LysN	119.178
205LeuH	7.47917		205LeuH	7.48417
205LeuN	120.244		205LeuN	120.265
206ThrH	8.04613		206ThrH	8.04902
206ThrN	118.062		206ThrN	118.106
207ValH	8.42524		207ValH	8.42786
207ValN	121.654		207ValN	121.679
208GluH	7.58331		208GluH	7.58748
208GluN	118.296		208GluN	118.277
209AspH	8.08506		209AspH	8.09963
209AspN	120.039		209AspN	120.207
210LeuH	8.4865		210LeuH	8.51339
210LeuN	122.472		210LeuN	122.342
211GluH	8.8719		211GluH	8.87919
211GluN	119.985		211GluN	120.146
212LysH	7.5055		212LysH	7.52549
212LysN	117.369		212LysN	117.595
213GluH	7.84805		213GluH	7.95429
213GluN	121.583		213GluN	121.291
214ArgH	8.94763		214ArgH	9.02895
214ArgN	119.003		214ArgN	119.151
215AspH	8.77929		215AspH	8.84312
215AspN	119.057		215AspN	119.081
216PheH	8.16685		216PheH	8.13353
216PheN	124.759		216PheN	124.451
217TyrH	8.13288		217TyrH	8.15606
217TyrN	118.528		217TyrN	118.333
218PheH	9.11687		218PheH	9.20533
218PheN	120.429		218PheN	120.612
219GlyH	8.41339		219GlyH	8.44404
219GlyN	105.336		219GlyN	105.168
220LysH	7.15857		220LysH	7.05275
220LysN	120.65		220LysN	119.985
221LeuH	7.47579		221LeuH	7.41062
221LeuN	118.914		221LeuN	118.625
222ArgH	8.09859		222ArgH	8.23753
222ArgN	119.33		222ArgN	119.122
223AsnH	7.72229		223AsnH	7.69347
223AsnHd21	7.26696		223AsnHd21	7.20331
223AsnHd22	6.87395		223AsnHd22	6.87225
223AsnN	118.091		223AsnN	118.158
223AsnNd2	112.344		223AsnNd2	112.387
224IleH	8.31229		224IleH	8.29408
224IleN	122.416		224IleN	122.61
225GluH	8.55309		225GluH	8.68466
225GluN	122.974		225GluN	123.08
226LeuH	7.63253		226LeuH	7.60446
226LeuN	118.403		226LeuN	118.147
227IleH	7.35056		227IleH	7.34278
227IleN	119.893		227IleN	119.906
228CysH	8.08475		228CysH	8.13663
228CysN	118.585		228CysN	118.876
229GlnH	8.26576		229GlnH	8.28128
229GlnHe21	7.3527		229GlnHe21	7.3411
229GlnHe22	6.6017		229GlnHe22	6.59523
229GlnN	119.494		229GlnN	119.535
229GlnNe2	110.586		229GlnNe2	110.39
230GluH	7.92738		230GluH	7.95864
230GluN	119.066		230GluN	119.2
231AsnH	7.33686		231AsnH	7.32763
231AsnHd21	7.71236		231AsnHd21	7.70053
231AsnHd22	7.1091		231AsnHd22	7.14346
231AsnN	115.591		231AsnN	115.385
231AsnNd2	116.173		231AsnNd2	116.239
232GluH	7.69242		232GluH	7.6312
232GluN	121.853		232GluN	122.022
233GlyH	8.60935		233GlyH	8.65717
233GlyN	108.972		233GlyN	108.816
234GluH	7.87276		234GluH	7.79658
234GluN	118.393		234GluN	118.203
235AsnH	8.21806		235AsnH	8.1833
235AsnHd21	6.74954		235AsnHd21	6.7429
235AsnHd22	7.45958		235AsnHd22	7.44962
235AsnN	117.789		235AsnN	117.571
235AsnNd2	112.338		235AsnNd2	112.372
236AspH	8.33746		236AspH	8.35127
236AspN	122.269		236AspN	121.996
238ValH	8.03426		238ValH	8.02547
238ValN	119.968		238ValN	119.996
239LeuH	7.72801		239LeuH	7.6794
239LeuN	119.138		239LeuN	119.171
240GlnH	8.12235		240GlnH	8.06488
240GlnHe21	7.49083		240GlnHe21	7.47863
240GlnHe22	6.72072		240GlnHe22	6.70584
240GlnN	116.656		240GlnN	116.644
240GlnNe2	113.833		240GlnNe2	113.665
241ArgH	7.30244		241ArgH	7.29358
241ArgN	117.878		241ArgN	117.996
242IleH	7.45805		242IleH	7.46312
242IleN	120.242		242IleN	120.263
243ValH	8.43361		243ValH	8.37667
243ValN	122.036		243ValN	122.166
244AspH	7.95784		244AspH	7.89331
244AspN	118.174		244AspN	117.961
245IleH	7.23962		245IleH	7.25389
245IleN	119.56		245IleN	119.456
246LeuH	8.3093		246LeuH	-
246LeuN	120.623		246LeuN	-
247TyrH	7.758		247TyrH	7.55909
247TyrN	114.706		247TyrN	112.538
248AlaH	7.28347		248AlaH	7.23575
248AlaN	124.113		248AlaN	123.633
249ThrH	8.55533		249ThrH	8.5188
249ThrN	114.124		249ThrN	112.882
250AspH	8.33012		250AspH	8.18312
250AspN	121.542		250AspN	120.692
251GluH	8.40547		251GluH	8.53032
251GluN	121.747		251GluN	121.446
252GlyH	8.34312		252GlyH	8.37795
252GlyN	109.277		252GlyN	109.839
253PheH	7.84605		253PheH	7.83911
253PheN	120.084		253PheN	119.891
254ValH	7.89645		254ValH	8.09862
254ValN	123.685		254ValN	122.791
255IleH	8.24907		255IleH	8.27654
255IleN	127.704		255IleN	127.261
257AspH	8.29237		257AspH	8.29717
257AspN	121.139		257AspN	121.072
258GluH	8.38447		258GluH	8.37285
258GluN	121.855		258GluN	121.808
259GlyH	8.42151		259GlyH	8.41909
259GlyN	110.28		259GlyN	110.25
260GlyH	7.87587		260GlyH	7.87738
260GlyN	115.208		260GlyN	115.199

## Sheet: 11mer
Resonance	Value	(ppm)	Resonance	Value	(ppm)
193AlaH	8.46375		193AlaH	8.46117
193AlaN	121.546		193AlaN	121.538
194AlaH	7.97754		194AlaH	7.97485
194AlaN	119.908		194AlaN	119.908
195GluH	7.8117		195GluH	7.80526
195GluN	118.668		195GluN	118.673
196LeuH	8.27602		196LeuH	8.27594
196LeuN	121.7		196LeuN	121.683
197MetH	8.524		197MetH	8.52369
197MetN	118.491		197MetN	118.434
198GlnH	7.54323		198GlnH	7.54028
198GlnHe21	6.80379		198GlnHe21	6.79946
198GlnHe22	7.30404		198GlnHe22	7.30232
198GlnN	119.032		198GlnN	119.014
198GlnNe2	111.376		198GlnNe2	111.389
199GlnH	7.74107		199GlnH	7.73612
199GlnHe21	7.21918		199GlnHe21	7.22109
199GlnHe22	6.70686		199GlnHe22	6.70642
199GlnN	119.552		199GlnN	119.531
199GlnNe2	110.161		199GlnNe2	110.191
200ValH	8.32793		200ValH	8.32924
200ValN	119.571		200ValN	119.586
201AsnH	7.60141		201AsnH	7.60029
201AsnN	118.75		201AsnN	118.731
202ValH	7.89272		202ValH	7.89384
202ValN	118.264		202ValN	118.297
203LeuH	8.51484		203LeuH	8.51317
203LeuN	123.113		203LeuN	123.107
204LysH	8.70686		204LysH	8.71709
204LysN	119.185		204LysN	119.188
205LeuH	7.49328		205LeuH	7.4966
205LeuN	120.257		205LeuN	120.291
206ThrH	8.05748		206ThrH	8.06347
206ThrN	118.054		206ThrN	118.021
207ValH	8.43073		207ValH	8.42917
207ValN	121.659		207ValN	121.865
208GluH	7.59436		208GluH	7.62215
208GluN	118.306		208GluN	118.45
209AspH	8.09436		209AspH	8.17604
209AspN	120.03		209AspN	120.436
210LeuH	8.49999		210LeuH	8.56765
210LeuN	122.463		210LeuN	122.798
211GluH	8.88217		211GluH	8.93276
211GluN	119.985		211GluN	120.352
212LysH	7.51645		212LysH	7.6312
212LysN	117.396		212LysN	117.796
213GluH	7.8582		213GluH	8.16329
213GluN	121.605		213GluN	121.901
214ArgH	8.95591		214ArgH	9.16768
214ArgN	119.002		214ArgN	119.591
215AspH	8.79176		215AspH	8.88034
215AspN	119.082		215AspN	119.267
216PheH	8.1794		216PheH	8.05857
216PheN	124.758		216PheN	124.246
217TyrH	8.14556		217TyrH	8.11464
217TyrN	118.543		217TyrN	118.081
218PheH	9.12093		218PheH	9.32422
218PheN	120.454		218PheN	120.951
219GlyH	8.43116		219GlyH	8.42347
219GlyN	105.352		219GlyN	104.821
220LysH	7.17107		220LysH	6.85805
220LysN	120.655		220LysN	119.291
221LeuH	7.4869		221LeuH	7.24741
221LeuN	118.877		221LeuN	118.248
222ArgH	8.1137		222ArgH	8.30073
222ArgN	119.338		222ArgN	119.331
223AsnH	7.7328		223AsnH	7.72083
223AsnHd21	7.27262		223AsnHd21	7.13516
223AsnHd22	6.88244		223AsnHd22	6.82833
223AsnN	118.102		223AsnN	117.697
223AsnNd2	112.317		223AsnNd2	112.544
224IleH	8.32032		224IleH	8.26669
224IleN	122.42		224IleN	122.66
225GluH	8.56431		225GluH	8.90771
225GluN	122.987		225GluN	123.827
226LeuH	7.64308		226LeuH	8.02052
226LeuN	118.414		226LeuN	118.333
227IleH	7.3665		227IleH	7.20459
227IleN	119.916		227IleN	119.847
228CysH	8.09515		228CysH	8.04952
228CysN	118.595		228CysN	119.605
229GlnH	8.27411		229GlnH	8.5193
229GlnHe21	7.36019		229GlnHe21	7.31662
229GlnHe22	6.61141		229GlnHe22	6.16334
229GlnN	119.48		229GlnN	118.597
229GlnNe2	110.573		229GlnNe2	110.003
230GluH	7.93485		230GluH	7.83674
230GluN	119.068		230GluN	119.588
231AsnH	7.34437		231AsnH	7.40612
231AsnHd21	7.72156		231AsnHd21	7.61702
231AsnHd22	7.11651		231AsnHd22	7.079
231AsnN	115.63		231AsnN	115.763
231AsnNd2	116.18		231AsnNd2	115.521
232GluH	7.70385		232GluH	7.62915
232GluN	121.832		232GluN	121.934
233GlyH	8.61444		233GlyH	8.64267
233GlyN	108.978		233GlyN	109.103
234GluH	7.88594		234GluH	7.78158
234GluN	118.412		234GluN	118.455
235AsnH	8.22799		235AsnH	8.19584
235AsnHd21	6.75883		235AsnHd21	6.76569
235AsnHd22	7.46747		235AsnHd22	7.45115
235AsnN	117.806		235AsnN	117.979
235AsnNd2	112.329		235AsnNd2	112.26
236AspH	8.33839		236AspH	8.32375
236AspN	122.277		236AspN	122.265
238ValH	8.04457		238ValH	8.05487
238ValN	119.964		238ValN	120.038
239LeuH	7.74636		239LeuH	7.7114
239LeuN	119.168		239LeuN	119.338
240GlnH	8.13621		240GlnH	8.07338
240GlnHe21	7.49835		240GlnHe21	7.47835
240GlnHe22	6.72893		240GlnHe22	6.69637
240GlnN	116.68		240GlnN	116.761
240GlnNe2	113.807		240GlnNe2	113.775
241ArgH	7.3138		241ArgH	7.2898
241ArgN	117.886		241ArgN	117.905
242IleH	7.47202		242IleH	7.47315
242IleN	120.271		242IleN	120.318
243ValH	8.44186		243ValH	8.34472
243ValN	122.026		243ValN	122.379
244AspH	7.96767		244AspH	7.80866
244AspN	118.204		244AspN	117.81
245IleH	7.24754		245IleH	7.21692
245IleN	119.554		245IleN	119.514
246LeuH	8.32085		246LeuH	8.3655
246LeuN	120.638		246LeuN	121.424
247TyrH	7.76576		247TyrH	7.43515
247TyrN	114.721		247TyrN	110.992
248AlaH	7.29451		248AlaH	7.0776
248AlaN	124.105		248AlaN	123.067
249ThrH	8.56203		249ThrH	8.62095
249ThrN	114.119		249ThrN	112.712
250AspH	8.3349		250AspH	7.47886
250AspN	121.539		250AspN	117.742
251GluH	8.40896		251GluH	8.9161
251GluN	121.73		251GluN	121.671
252GlyH	8.35053		252GlyH	8.66683
252GlyN	109.266		252GlyN	112.369
253PheH	7.8526		253PheH	8.07596
253PheN	120.077		253PheN	120.275
254ValH	7.90335		254ValH	8.88674
254ValN	123.647		254ValN	117.155
255IleH	8.25471		255IleH	8.46132
255IleN	127.676		255IleN	125.642
257AspH	8.29765		257AspH	8.27344
257AspN	121.128		257AspN	121.05
258GluH	8.38844		258GluH	8.38804
258GluN	121.848		258GluN	121.753
259GlyH	8.42828		259GlyH	8.42653
259GlyN	110.278		259GlyN	110.172
260GlyH	7.88266		260GlyH	7.86408
260GlyN	115.213		260GlyN	115.152
