# Supplementary material for: Dock-and-lock binding of SxIP ligands is required for stable and selective EB1 interactions
Source: eLife. 2025 Dec 10;13:RP98063. doi: 10.7554/eLife.98063 (PMC12695022; doi:10.7554/eLife.98063)
Supplement: Figure 1—source data 2. [file elife-98063-fig1-data2.xlsx]

## Sheet: Sheet1
Residue	apo_seq	apo int	apo vol	apo		4MACF_seq	4MACF int	4MACF vol	4MACF		6MACF_seq	6MACF int	6MACF vol	6MACF		11MACF_seq	11MACF ini	11MACF vol	11MACF
193	193AlaH	47169100	414402000	0.22026		193AlaH	53652600	300770000	0.254109		193AlaH	8555610	164933000	0.265545		193AlaH	134206000	1097590000	0.260565
194	194AlaH	43361600	381197000	0.20248		194AlaH	50432100	291647000	0.238856		194AlaH	7955610	60225400	0.246922		194AlaH	121261000	1003730000	0.235432
195	195GluH	33127300	291854000	0.154691		195GluH	40525700	241951000	0.191938		195GluH	6872140	52792700	0.213294		195GluH	91268400	753442000	0.177201
196	196LeuH	22912000	202213000	0.106989		196LeuH	31634900	186958000	0.149829		196LeuH	4184780	31412400	0.129885		196LeuH	62298600	515501000	0.120955
197	197MetH	27476100	242186000	0.128302		197MetH	29971500	193101000	0.141951		197MetH	5356000	41321400	0.166237		197MetH	85336600	724074000	0.165684
198	198GlnH	28782200	253606000	0.134401		198GlnH	35433000	207539000	0.167818		198GlnH	5788920	45061800	0.179674		198GlnH	87057600	715308000	0.169025
199	199GlnH	26215400	231353000	0.122415		199GlnH	31979600	199184000	0.151462		199GlnH	6405080	50232900	0.198798		199GlnH	76644500	633582000	0.148808
200	200ValH	22947700	202641000	0.107156		200ValH	26632100	168772000	0.126135		200ValH	4657420	35621500	0.144555		200ValH	63080500	527159000	0.122473
201	201AsnH	25013500	220692000	0.116803		201AsnH	33837300	194102000	0.16026		201AsnH	4980330	38682200	0.154577		201AsnH	78825100	644645000	0.153042
202	202ValH	14045000	125409000	0.0655843		202ValH	34367700	212025000	0.162772		202ValH	5132490	39486700	0.1593		202ValH	71170900	594115000	0.138181
203	203LeuH	18650500	164872000	0.08709		203LeuH	23516200	147725000	0.111377		203LeuH	3557940	28641300	0.11043		203LeuH	53513600	444013000	0.103898
204	204LysH	22276000	196703000	0.10402		204LysH	27003000	171967000	0.127891		204LysH	4661880	36939900	0.144693		204LysH	62272600	521293000	0.120904
205	205LeuH	28374500	251688000	0.132497		205LeuH	32819000	200466000	0.155437		205LeuH	7112300	55575400	0.220748		205LeuH	84236500	710487000	0.163548
206	206ThrH	20867100	184308000	0.0974406		206ThrH	28533100	169718000	0.135138		206ThrH	3978510	31348100	0.123483		206ThrH	65203100	534934000	0.126594
207	207ValH	13884600	124026000	0.0648353		207ValH	8643520	55263100	0.0409374		207ValH	3404020	25393600	0.105652		207ValH	54855700	449917000	0.106504
208	208GluH	23750500	209689000	0.110905		208GluH	32591800	184846000	0.154361		208GluH	6345820	50474200	0.196958		208GluH	71932000	584864000	0.139658
209	209AspH	26854100	236531000	0.125397		209AspH	33312000	190845000	0.157772		209AspH	4603280	35737600	0.142874		209AspH	70832600	571857000	0.137524
210	210LeuH	19004900	167944000	0.0887449		210LeuH	21629500	139363000	0.102442		210LeuH	3222600	24942800	0.100021		210LeuH	47927300	398507000	0.0930524
211	211GluH	20743700	183158000	0.0968644		211GluH	23768900	144870000	0.112574		211GluH	4291760	33294600	0.133205		211GluH	51654700	429408000	0.100289
212	212LysH	23252000	205101000	0.108577		212LysH	30453200	186505000	0.144232		212LysH	4747350	36712000	0.147346		212LysH	67077200	550845000	0.130233
213	213GluH	22857500	201721000	0.106735		213GluH	26562400	167166000	0.125805		213GluH	4572290	35035200	0.141912		213GluH	49857500	412339000	0.0968
214	214ArgH	15509100	137097000	0.072421		214ArgH	17721700	109508000	0.0839334		214ArgH	3496590	27412500	0.108525		214ArgH	39810800	327303000	0.077294
215	215AspH	17201300	151894000	0.0803229		215AspH	18203900	115362000	0.0862172		215AspH	3278770	25674600	0.101765		215AspH	43606300	362586000	0.0846631
216	216PheH	16846900	148738000	0.078668		216PheH	21552200	120627000	0.102075		216PheH	2859320	21701200	0.0887461		216PheH	39041900	325926000	0.0758011
217	217TyrH	17438800	154004000	0.0814319		217TyrH	21835800	123711000	0.103419		217TyrH	2163760	16529900	0.0671577		217TyrH	41770200	345181000	0.0810982
218	218PheH	15538900	137255000	0.0725601		218PheH	18993400	121760000	0.0899564		218PheH	2621790	20937600	0.0813738		218PheH	37813500	322010000	0.0734161
219	219GlyH	16678900	147447000	0.0778835		219GlyH	16997400	102809000	0.080503		219GlyH	3332020	26589600	0.103418		219GlyH	37937800	314295000	0.0736575
220	220LysH	16206700	143247000	0.0756785		220LysH	21884200	133757000	0.103648		220LysH	3729290	29623900	0.115748		220LysH	41305000	344643000	0.080195
221	221LeuH	14077800	124579000	0.0657374		221LeuH	23362200	130691000	0.110648		221LeuH	2987260	23188100	0.0927171		221LeuH	38103200	310319000	0.0739786
222	222ArgH	21257800	187591000	0.099265		222ArgH	27098500	158628000	0.128344		222ArgH	3524250	26905300	0.109384		222ArgH	37092500	309704000	0.0720163
223	223AsnH	23269700	205283000	0.10866		223AsnH	26841800	160380000	0.127128		223AsnH	4936250	38535800	0.153209		223AsnH	53548700	440576000	0.103967
224	224IleH	14120900	125259000	0.0659387		224IleH	17501400	108662000	0.08289		224IleH	2985780	23053400	0.0926711		224IleH	36393500	301078000	0.0706592
225	225GluH	19670900	173772000	0.0918549		225GluH	22245200	137705000	0.105358		225GluH	3075520	23914700	0.0954564		225GluH	31782100	263204000	0.061706
226	226LeuH	22675900	200111000	0.105887		226LeuH	28837700	161713000	0.136581		226LeuH	4415440	35052300	0.137044		226LeuH	25654100	213626000	0.0498083
227	227IleH	17544600	154898000	0.0819259		227IleH	25695100	158367000	0.121697		227IleH	3859690	30113300	0.119795		227IleH	49948100	410296000	0.0969759
228	228CysH	18335700	162088000	0.08562		228CysH	23406400	143475000	0.110857		228CysH	3792300	29219800	0.117703		228CysH	50462300	411750000	0.0979742
229	229GlnH	25726100	226912000	0.12013		229GlnH	28755800	181584000	0.136193		229GlnH	4632080	36060600	0.143768		229GlnH	46125900	404277000	0.0895549
230	230GluH	31894400	280816000	0.148933		230GluH	38351400	220694000	0.18164		230GluH	6177450	47361600	0.191733		230GluH	80131700	657790000	0.155578
231	231AsnH	25721500	227193000	0.120109		231AsnH	32321200	194009000	0.153079		231AsnH	5180890	39903100	0.160802		231AsnH	74187900	620091000	0.144038
232	232GluH	51979500	455857000	0.242722		232GluH	57379300	330392000	0.271759		232GluH	10125800	75797300	0.314279		232GluH	141748000	1140050000	0.275208
233	233GlyH	40861100	359574000	0.190804		233GlyH	40870500	238841000	0.193571		233GlyH	6700810	50503600	0.207976		233GlyH	93009700	766351000	0.180581
234	234GluH	51705300	455749000	0.241442		234GluH	48822900	298872000	0.231235		234GluH	8705620	66809000	0.270201		234GluH	124573000	1020470000	0.241863
235	235AsnH	49132300	431828000	0.229427		235AsnH	50554800	292588000	0.239437		235AsnH	7492220	57472000	0.23254		235AsnH	128818000	1057590000	0.250104
236	236AspH	45373800	398882000	0.211877		236AspH	46753700	272676000	0.221435		236AspH	8149010	61960600	0.252925		236AspH	121729000	986247000	0.236341
238	238ValH	22707000	200337000	0.106032		238ValH	25589100	156896000	0.121195		238ValH	3539100	27480000	0.109845		238ValH	70995000	578708000	0.137839
239	239LeuH	17645500	155922000	0.0823971		239LeuH	21635200	130841000	0.102469		239LeuH	3054490	24361600	0.0948037		239LeuH	51805800	434004000	0.100583
240	240GlnH	22588100	199202000	0.105477		240GlnH	22803000	143145000	0.107999		240GlnH	4200310	31927200	0.130367		240GlnH	65021600	536988000	0.126242
241	241ArgH	19640300	173319000	0.091712		241ArgH	27121800	164784000	0.128454		241ArgH	4230930	32910300	0.131317		241ArgH	59248000	499666000	0.115032
242	242IleH	2959460	26977700	0.0138194		242IleH	17401000	118387000	0.0824145		242IleH	1735290	15144300	0.053859		242IleH	44291600	380612000	0.0859936
243	243ValH	19305600	170587000	0.0901491		243ValH	23716200	132774000	0.112325		243ValH	4111850	30806700	0.127622		243ValH	54981200	450021000	0.106748
244	244AspH	26257200	231270000	0.12261		244AspH	28558200	169929000	0.135257		244AspH	4860410	37187700	0.150855		244AspH	68623800	557144000	0.133235
245	245IleH	16722700	147783000	0.078088		245IleH	25240200	144388000	0.119542		245IleH	3649240	28592400	0.113263		245IleH	50258900	410664000	0.0975793
246	246LeuH	16751600	147916000	0.0782229		246LeuH	21258100	127745000	0.100682		246LeuH	3786050	27857000	0.117509		246LeuH	42922400	357962000	0.0833352
247	247TyrH	22663000	200179000	0.105827		247TyrH	23354600	152520000	0.110612		247TyrH	3373410	26823100	0.104702		247TyrH	47682900	393205000	0.0925779
248	248AlaH	37972100	333391000	0.177314		248AlaH	57032600	308847000	0.270117		248AlaH	7871700	59180300	0.244318		248AlaH	91101600	744359000	0.176877
249	249ThrH	34178700	301488000	0.1596		249ThrH	40721700	236495000	0.192866		249ThrH	5718930	44796800	0.177501		249ThrH	64879800	542804000	0.125966
250	250AspH	65341300	573325000	0.305116		250AspH	66928500	385784000	0.316986		250AspH	5919420	49655200	0.183724		250AspH	40241200	331869000	0.0781296
251	251GluH	111845000	985066000	0.522269		251GluH	111897000	521094000	0.529966		251GluH	1710880	19535000	0.0531014		251GluH	98182600	785649000	0.190625
252	252GlyH	109256000	955415000	0.51018		252GlyH	108677000	576552000	0.514715		252GlyH	15409300	114358000	0.478266		252GlyH	50127600	418574000	0.0973244
253	253PheH	143616000	1252330000	0.670626		253PheH	144718000	748310000	0.685413		253PheH	20794700	153148000	0.645415		253PheH	79838200	651596000	0.155008
254	254ValH	144198000	1260950000	0.673344		254ValH	152502000	765953000	0.722279		254ValH	12265600	91765200	0.380693		254ValH	24444700	204907000	0.0474602
255	255IleH	156605000	1365710000	0.73128		255IleH	150595000	791865000	0.713247		255IleH	18828400	139064000	0.584386		255IleH	75217300	620136000	0.146037
257	257AspH	195285000	1697310000	0.911899		257AspH	226948000	1063840000	1.07487		257AspH	27097900	201940000	0.841051		257AspH	192159000	1533570000	0.373083
258	258GluH	216761000	1891060000	1.01218		258GluH	220054000	1091910000	1.04222		258GluH	30417100	223412000	0.94407		258GluH	382118000	3032060000	0.741895
259	259GlyH	180854000	1575010000	0.844512		259GlyH	178939000	903557000	0.84749		259GlyH	28539600	208089000	0.885798		259GlyH	400948000	3172690000	0.778454
260	260GlyH	214152000	1861270000	1		260GlyH	211140000	1069960000	1		260GlyH	32219100	233912000	1		260GlyH	515057000	4022990000	1
