# Supplementary material for: Dock-and-lock binding of SxIP ligands is required for stable and selective EB1 interactions
Source: eLife. 2025 Dec 10;13:RP98063. doi: 10.7554/eLife.98063 (PMC12695022; doi:10.7554/eLife.98063)
Supplement: Figure 3—source data 1. [file elife-98063-fig3-data1.xlsx]

## Sheet: Averages SD
			KD (M)		∆H (kJ/mol)		∆G (kJ/mol)		-T∆S (kJ/mol)				N sites
			Mean	SD	Mean	SD	Mean	SD	Mean	SD			Mean	SD	N
	EBH	11MACF	3.50667e-06	1.08302e-06	-39.6333	4.45009	-31.2333	0.80829	8.39667	3.64571		EBH/f9MACF	0.85775	0.101197	4
		11MACF-LLL	2.87e-07	8.75728e-08	-35.8333	5.3799	-37.5	0.87178	-4.90667	1.405		EBH/9MACF	1.0015	0.0403051	2
		11MACF-VLL	8.10667e-08	8.81211e-09	-40.1333	1.2741	-40.5333	0.251661	-1.30333	0.0907377		EBH/11MACF	1.133	0.168306	3
		13MACF-VLLRK	1.59333e-08	2.73191e-09	-27.8	0.3	-44.5667	0.472582	-16.7667	0.321455		EBH/11MACF-LLL	1.008	0.116155	3
												EBH/11MACF-VLL	0.906	0.0555698	3
			KD (M)		∆H (kJ/mol)		∆G (kJ/mol)		-T∆S (kJ/mol)			EBH/11MACF-VLLRK	1.18167	0.136045	3
			Mean	SD	Mean	SD	Mean	SD	Mean	SD		EBH/f12CLASP2	1.00433	0.122451	3
	EBH	f9MACF	6.44e-05	9.10659e-06	-40.3333	6.7951	-23.9333	0.351188	16.3733	6.41094		EBH/f11CK5P2	0.984333	0.118154	3
		f12CLASP2	3.49333e-05	3.76342e-06	-27.8	6.29603	-25.4667	0.305505	5.64667	1.93164		EBH/13CK5P2	0.87575	0.093107	4
		f11CK5P2	1.2e-06	1.22882e-07	-26.1667	0.763763	-33.8	0.264575	-7.63	0.960625		EBH-ΔC/11MACF	1.07567	0.351668	3
												EBH-ΔC/11MACF-VLL	0.986333	0.180423	3
			KD (M)		ΔH (kJ/mol)		ΔG (kJ/mol)		-TΔS (kJ/mol)			EBH-ΔC/11MACF-VLLRK	0.95975	0.0559308	4
			Mean	SD	Mean	SD	Mean	SD	Mean	SD
	EBH	9MACF	3.4e-05	5.65685e-07	-5.97	0.0141421	-6.095	0.00707107	-0.126	0.0240416
		13CK5P2	2.06385e-08	2.21173e-08	-8.685	2.09739	-11.05	1.17331	-2.344	1.17132
			KD (M)		∆H (kJ/mol)		∆G (kJ/mol)		-T∆S (kJ/mol)
			Mean	SD	Mean	SD	Mean	SD	Mean	SD
	EBHdC	WT	6.85e-05	3.11812e-05	-27.5	1.95192	-24	1.38924	3.484	3.13084
		VLL	1.86667e-05	3.12143e-06	-24.9	4.50777	-27	0.43589	-2.13667	4.8327
		VLLRK	6.28667e-06	4.72476e-07	-24.6333	4.63717	-29.7	0.173205	-5.057	4.63822
