# Supplementary material for: Dock-and-lock binding of SxIP ligands is required for stable and selective EB1 interactions
Source: eLife. 2025 Dec 10;13:RP98063. doi: 10.7554/eLife.98063 (PMC12695022; doi:10.7554/eLife.98063)
Supplement: Figure 5—source data 1. [file elife-98063-fig5-data1.xlsx]

## Sheet: SxIP positive EB1 comets
		EB1	GFP	WT	VLL	Dimer
	N1	0	0	0	0.17793	0.795322
		0	0	0	0.378812	0.584112
		0	0	0	0.426614	0.853301
		0	0	0	0.0012	0.721536
		0	0	0	0	0.776882
	N2	0	0	0	0	0.570621
		0	0	0	0	0.654275
		0	0	0	0	0.709859
		0	0	0	0	0.896679
		0	0	0	0	1.05415
	N3	0	0	0	0.00658	0.460208
		0	0	0	0.0002	0.0374449
		0	0	0	0	0.996479
		0	0	0	0	1.00204
		0	0	0	0	0.53616
		0	0			0.836096
	Mean	0	0	0	0.0660891	0.717823
	SD	0	0	0	0.144342	0.251835

## Sheet: No. EB1 comets
		EB1	GFP	WT	VLL	Dimer
	N1	162	485	207		171
		232	416	323	134	214
		603	364	213	125	349
		335	257	418	623	729
		817	355	387	511	289
	N2	329	372	678	100	202
		239	410	156	375	176
		239	292	369	288	355
		301	494	237	183	243
		218	262	284	490	277
	N3	379	198	507	475	133
		130	302	191	235	454
		584	294	503	242	284
		560	234	376	194	491
		302	414	466	441	215
		228	336			543
	Mean	353.625	342.812	354.333	315.429	320.312
	SD	190.013	86.735	145.365	168.383	161.327
